# Supplementary material for: Linezolid Inhibited Synthesis of ATP in Mitochondria: Based on GC-MS Metabolomics and HPLC Method
Source: Hindawi journal article supplement (doi:10.1155/2018/3128270), 2018-10-16
Supplement: f1 [file 3128270.f1.zip]

## Supplement tables

**Table 1.** The serum concentration of linezolid ( $\mu\text{g/mL}$ ) in Low-group and High-groups after intragastric administration for 7 days

| NO.  | High-group | Low-group |
|------|------------|-----------|
| 1.00 | 0.514      | <0.125    |
| 2.00 | 0.830      | <0.125    |
| 3.00 | 0.337      | <0.125    |
| 4.00 | 0.298      | <0.125    |
| 5.00 | 0.265      | <0.125    |
| 6.00 | 0.389      | <0.125    |
| 7.00 | 0.277      | <0.125    |
| 8.00 | 0.406      | 0.232     |
| 9.00 | 0.211      | 0.154     |

**Table 2.** The detailed ATP concentration( $\mu\text{g/mL}$ ) of C3A cells cultured with linezolid

| NO.  | With linezolid | Without linezolid |
|------|----------------|-------------------|
| 1.00 | 2.843          | 4.974             |
| 2.00 | 1.976          | 5.302             |
| 3.00 | 1.970          | 5.138             |

**Table 3.** The blood parameters of three groups and ANOVA statistical analysis

| Parameter                                 | abbr | unit   | Control-group      | Low-group          | High-group         | Sig.  |
|-------------------------------------------|------|--------|--------------------|--------------------|--------------------|-------|
| White blood corpuscles                    | WBC  | 109/L  | $6.73 \pm 1.39$    | $6.26 \pm 1.22$    | $5.19 \pm 1.29$    | 0.038 |
| Percentage of neutrophils                 | PN   | %      | $40.93 \pm 13.78$  | $41.06 \pm 4.19$   | $39.64 \pm 9.86$   | 0.941 |
| Absolute neutrophil count                 | NC   | 109/L  | $3.07 \pm 1.42$    | $2.20 \pm 0.58$    | $2.37 \pm 0.59$    | 0.115 |
| Red blood corpuscles                      | RBC  | 1012/L | $8.90 \pm 1.54$    | $8.21 \pm 0.80$    | $7.56 \pm 1.88$    | 0.148 |
| Hemoglobin                                | HGB  | g/L    | $163.37 \pm 9.79$  | $150.39 \pm 8.31$  | $141.45 \pm 15.05$ | 0.001 |
| Hematocrit                                | HCT  | %      | $49.35 \pm 6.88$   | $46.15 \pm 5.76$   | $40.16 \pm 8.38$   | 0.023 |
| Mean corpuscular volume                   | MCV  | fl     | $71.54 \pm 16.54$  | $59.87 \pm 6.40$   | $57.15 \pm 6.57$   | 0.015 |
| Mean corpuscular hemoglobin               | MCH  | pg     | $21.82 \pm 5.04$   | $18.28 \pm 1.93$   | $17.43 \pm 2.00$   | 0.015 |
| Mean corpuscular hemoglobin concentration | MCHC | g/L    | $349.32 \pm 76.79$ | $300.10 \pm 32.57$ | $284.80 \pm 32.73$ | 0.025 |
| Platelets                                 | PLT  | 109/L  | $584.4 \pm 129.64$ | $447.6 \pm 118.51$ | $436.8 \pm 113.02$ | 0.018 |
