# Supplementary material for: Linezolid Inhibited Synthesis of ATP in Mitochondria: Based on GC-MS Metabolomics and HPLC Method
Source: Biomed Res Int. 2018 Oct 16;2018:3128270. doi: 10.1155/2018/3128270 (PMC6206563; doi:10.1155/2018/3128270)
Supplement: Supplementary Materials — Supplement Tables 1 and 2 listed the concentration of linezolid in rat and ATP in C3A cells. Supplement Table 3 listed indexes of blood routine test after administration of linezolid. Supplement Figure 1 showed the results of PCA analysis based on the GC-MS. [file 3128270.f1.zip]

Archive with 2 entries (2 files):
- 3128270.f1.pdf
- 3128270.f2.ppt
